# Supplementary material
Source: PubMed Central journal article supplement (PMC5599366)
Supplement: NIHMS899621-supplement-2.pdf [file NIHMS899621-supplement-2.pdf]

## SUPPLEMENTARY FIGURES

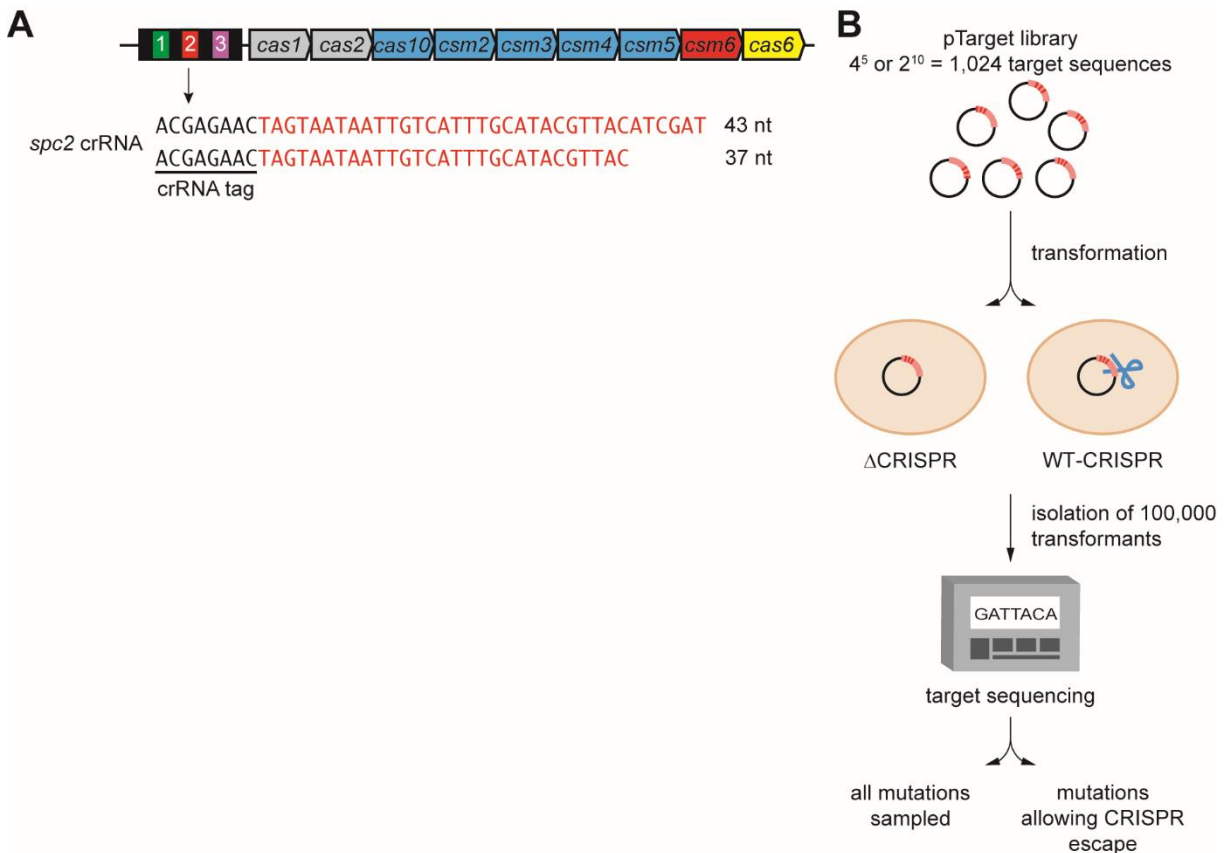

**Fig. S1. Target library construction and next-generation sequencing.** Related to Fig. 1. **(A)** Genetic organization of the *S. epidermidis* RP62a type III-A CRISPR-*cas* locus. This locus harbors three spacers (numbered, colored boxes) and nine *cas* genes. *cas1-2* (grey) are involved in the integration of new spacers into the CRISPR array. *cas10* and *csm2-5* (blue) encode a protein complex that contains the crRNA. *csm6* (red) encodes a non-sequence specific RNase that degrades target transcripts. *cas6* (yellow) encodes for the endoribonuclease that cleaves the crRNA precursor at every repeat sequence. After this cleavage, mature crRNAs are generated that contain an 8-nucleotide repeat sequence known as the “tag” and a variable spacer sequence length. Previous studies have identified the most abundant mature crRNA species being 43- and 37-nucleotides long, differing by 6-nucleotides at the 3’ end. **(B)** Target plasmid libraries generated in this study contained either completely randomized 5-nucleotide sequences ( $4^5=1024$  different sequences) or 10-nucleotide sequences with only two different bases in each position ( $2^{10}=1024$  different sequences). Target library plasmids were introduced via electroporation into *S. aureus* OS2 cells harboring plasmids with either a wild-type type III-A CRISPR-Cas system (WT-CRISPR) or a mutant system in which the repeats and spacers are deleted ( $\Delta$ CRISPR). Approximately 100,000 transformants of each strain were collected, DNA extracted, the target amplified by PCR and subjected to next generation sequencing to determine the number of reads and sequence of targets that survive type III-A CRISPR-Cas immunity and compare it to the number of reads obtained for the non-targeting  $\Delta$ CRISPR control.

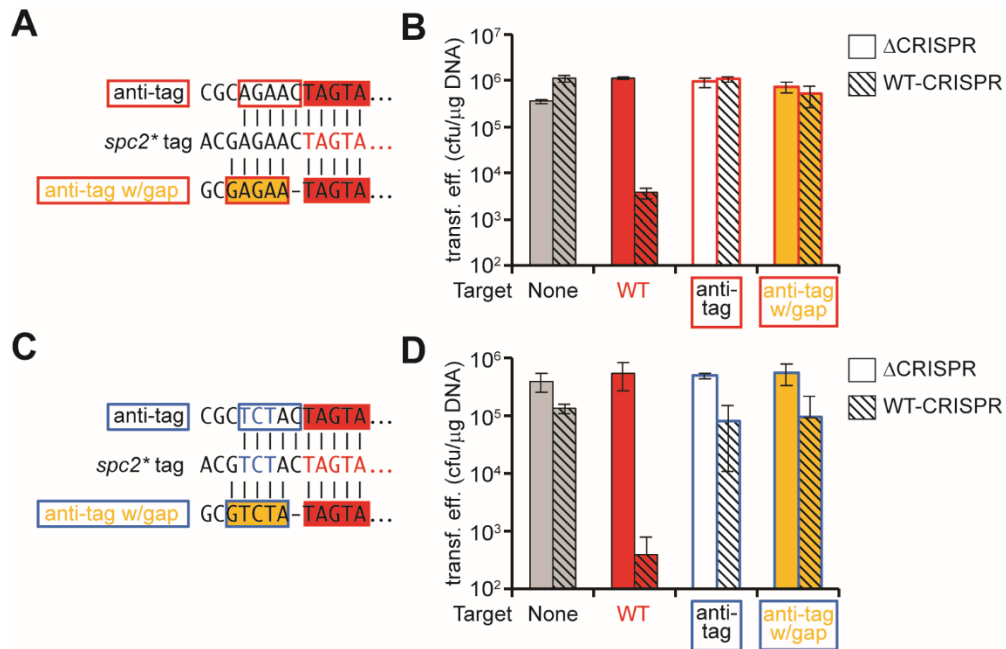

**Fig. S2. A gap in the alignment of the tag and anti-tag sequences allows escape from type III-A targeting.** Related to Fig. 2. **(A)** Constuction of a perfect and gapped anti-tag targets. The alignment of the protospacer flanking sequences to the CRISPR repeat upstream of *spc2* is shown. **(B)** Transformation efficiencies of pTargets shown in **(A)** into WT-CRISPR and  $\Delta$ CRISPR cells. Transformation efficiencies of plasmids harboring either no target or a target with a wild-type 5' end flanking sequence are shown as controls. The mean  $\pm$  SD of 3 independent experiments are reported. **(C)** Constuction of a perfect and gapped anti-tag targets for the *spc2\** mutant repeat. The alignment of the protospacer flanking sequences to the CRISPR repeat upstream of *spc2\** is shown. **(D)** Transformation efficiencies of pTargets shown in **(C)** into WT-CRISPR and  $\Delta$ CRISPR cells. Transformation efficiencies of plasmids harboring either no target or a target with a wild-type 5' end flanking sequence are shown as controls. The mean  $\pm$  SD of 3 independent experiments are reported.

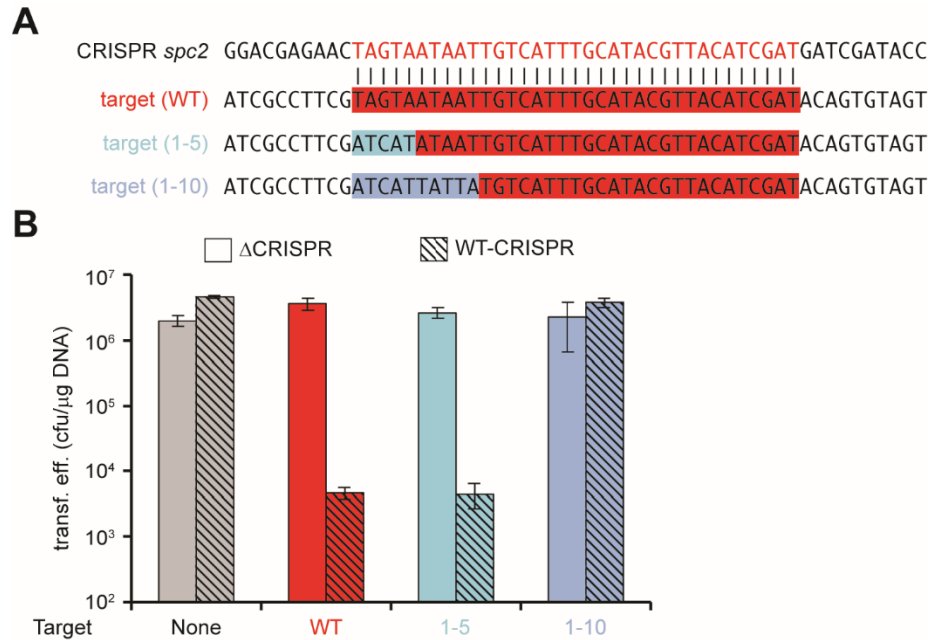

**Fig. S3. Ten, but not five, mismatches in the first 10 nucleotides of the protospacer abrogate type III-A CRISPR-Cas immunity.** Related to Fig. 3. **(A)** Either the first five or ten bases of the pTarget protospacer were mutated by changing the wild-type nucleotide to its Watson-Crick complementary base. **(B)** Transformation efficiencies for different pTargets plasmids shown in **(A)** into cells containing the pWT-CRISPR or pΔCRISPR plasmids. Transformation efficiencies of plasmids harboring either no target or a wild-type target are shown as controls. The mean ± SD of 3 independent experiments are reported.

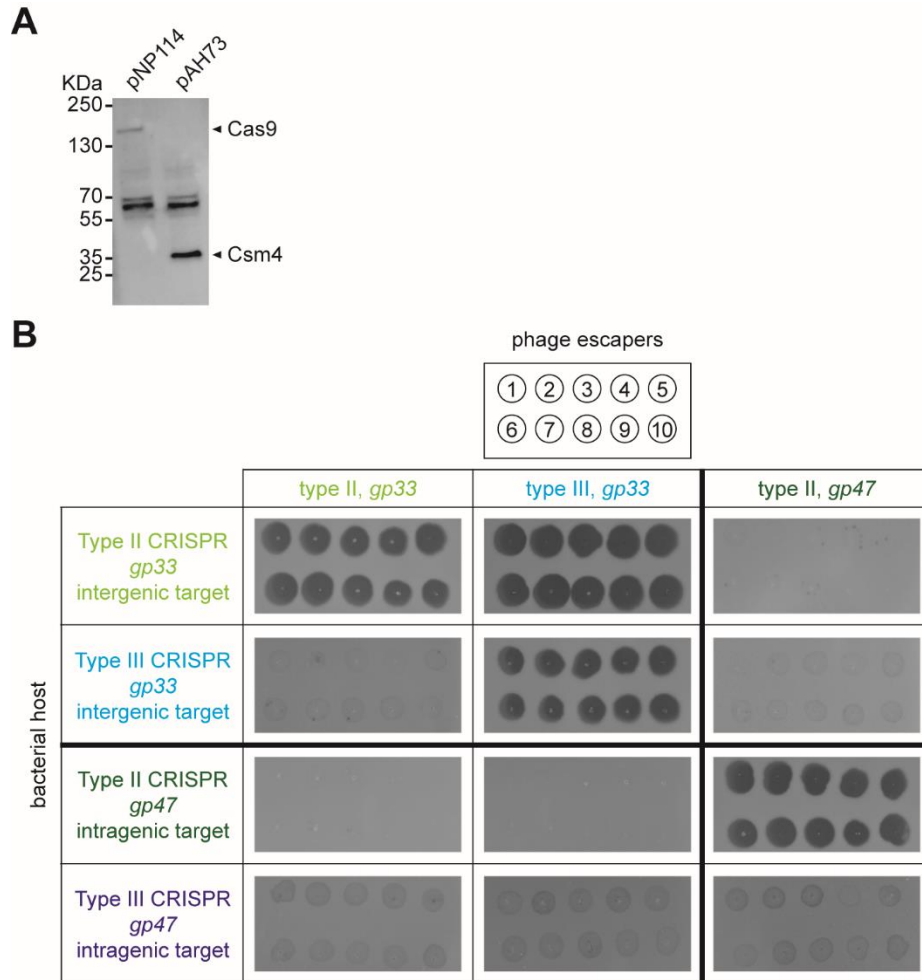

**Fig. S4. Phages that escape type III-A CRISPR-Cas immunity are not susceptible to type II-A targeting.** Related to Fig. 5. **(A)** Western blot analysis of type II and III expression. In order to compare the expression levels of Cas9 and the Cas10-Csm complex we added a hexa-histidyl tag to Cas9 and Csm4, respectively, and performed western blot analysis of total protein extracts using an anti-His-tag antibody. pNP114 and pAH73, protein extracts from staphylococci expressing tagged versions of Cas9 and Csm4, respectively. **(B)** Ten different phages that escape the different type II-A and III-A targeting were spotted onto bacterial lawns harboring these different CRISPR-Cas systems. Bacteriophages that are able to lyse the bacteria in the lawn create a clear zone of inhibition of growth.

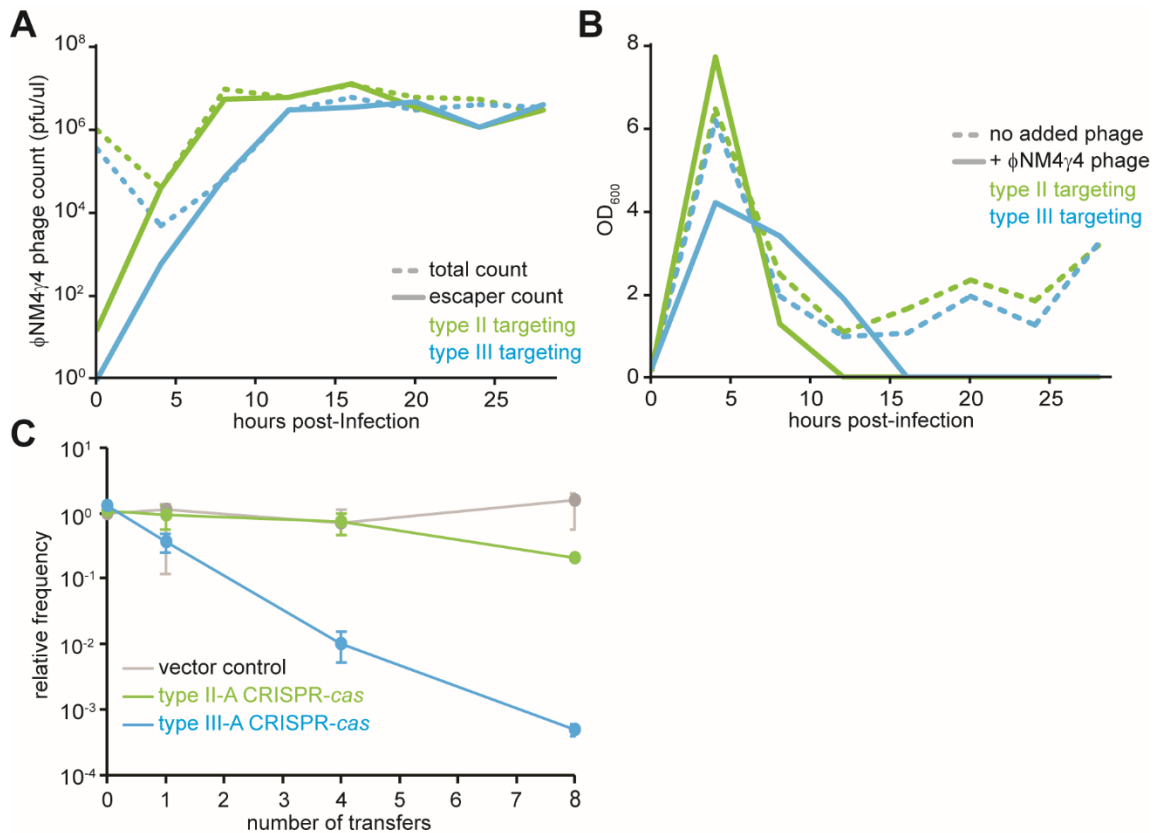

**Fig. S5. Deletions of non-essential phage target regions allows for escape from type III-A CRISPR-Cas immunity.** Related to Fig. 6. **(A)**  $\phi$ NM4 $\gamma$ 4 phage titers measured as pfu/ml every 4 hours after infection of cells carrying type II-A (light green) or type III-A (light blue) systems targeting the *gp33* non-essential gene. Total phage titers (dotted line) were calculated after plating samples on non-CRISPR strain RN4220. Escaper phage titers (full line) were calculated by plating samples on CRISPR-immune bacterial strains. **(B)** Bacterial growth measured as OD<sub>600</sub> every 4 hours after  $\phi$ NM4 $\gamma$ 4 infection of cells carrying type II-A (light green) or type III-A (light blue) systems targeting the *gp33* non-essential gene. Growth measurements of non-infected cells (dotted lines) are shown as controls. **(C)** Pairwise competition analysis of staphylococci harboring the erythromycin-resistant pE194 plasmid or a chloramphenicol-resistant plasmid either without any insert or harboring the *S. pyogenes* type II-A or the *S. epidermidis* III-A CRISPR-cas locus. Cultures were mixed in a 1:1 ratio and grown for 24 hs before plating serial dilutions into media containing either erythromycin or chloramphenicol to count the number of bacteria containing each plasmid and calculate the relative frequency of chloramphenicol-resistant to erythromycin-resistant staphylococci. The experiment was performed in triplicate, with counting on days 0, 1, 4 and 8. The rapid decrease of the number of chloramphenicol-resistant cells relative to the erythromycin-resistant cells when they harbor a type III-A CRISPR-Cas system reveals a fitness cost for this locus, not present in staphylococci harboring the type II-A locus. The toxicity associated with the type III-A system may be due to higher rate of off-target chromosomal cleavage compared with the type II-A system, however it is important to note that the spacer content of these systems (which should determine the number of off-targets) is different.

## SUPPLEMENTARY TABLES

**Supplementary table S1. Related to STAR Methods. Oligonucleotides used in this study.**

| Primer name          | Sequence                                                                          |
|----------------------|-----------------------------------------------------------------------------------|
| GG211                | CATCATCTGCCTCCTCAACATTG                                                           |
| GG212                | TTAGAGATGCCAGACGATGAATC                                                           |
| GG213                | CTTTGCTATACATCTACTCTGAC                                                           |
| GG215                | TTTAAATTTTATCCCGACCAACAAGCAATTGTTATAGTGA                                          |
| H29 <sup>(a)</sup>   | aaacAAAAATGTTTTAACACCTATTAACGTAGTATg                                              |
| H30 <sup>(a)</sup>   | aaaacATACTACGTTAATAGGTGTTAAAACATTTTT                                              |
| H117 <sup>(a)</sup>  | aaacCTTTAAATGTTTTAAAAGAATAGCATCATTg                                               |
| H118 <sup>(a)</sup>  | aaaacAATGATGCTATTCTTTTAAAACATTTAAAG                                               |
| H346 <sup>(a)</sup>  | aaacATACGTGTAAGACATATTAGATCGAGTCag                                                |
| H347 <sup>(a)</sup>  | aaaacTGACTCGATCTAATATGTCTTTACACGTAT                                               |
| H433 <sup>(a)</sup>  | aaacAAACAGTGACAGAAACTATTGAGTACGAGGg                                               |
| H434 <sup>(a)</sup>  | aaaacCCTCGTACTCAATAGTTTCTGTCACTGTTT                                               |
| H478 <sup>(a)</sup>  | aaacTTATTTTGCCTTAGAATTGACACCTCAAGAg                                               |
| H479 <sup>(a)</sup>  | aaaacTCTTGAGGTGTCAATTCTAACGCAAATAA                                                |
| H480 <sup>(a)</sup>  | aaacTTATCGTGAGTGGGAGAAATATAAGCGAAAg                                               |
| H481 <sup>(a)</sup>  | aaaacTTTCGCTTATATTTCTCCCACTCACGATAA                                               |
| H482 <sup>(a)</sup>  | aaacGACAAATGCTATTCAACATTCAGTTAAAGAg                                               |
| H483 <sup>(a)</sup>  | aaaacTCTTTAACTGAATGTTGAATAGCATTTGTCT                                              |
| H488 <sup>(a)</sup>  | aaacTTGTTTATCGATTGGAGCATGCAAATAACTg                                               |
| H489 <sup>(a)</sup>  | aaaacAGTTATTTGCATGCTCCAATCGATAAAACAA                                              |
| H494 <sup>(a)</sup>  | aaacGGATATTGTCGTTTTCCCGTCAAAGTATGGg                                               |
| H495 <sup>(a)</sup>  | aaaacCCATACTTTGACGGGAAAACGACAATATCC                                               |
| L55                  | TAAATCTAACAACACTCTAA                                                              |
| L56                  | TTAGAGTGTGTTAGATTTA                                                               |
| L65                  | GTGATGGCATTGTTAAAGTATC                                                            |
| L66                  | GATACTTTAACAATGCCATCAC                                                            |
| L409                 | CGTGGTAAATCGGATAACGTTCCAAGTGAAG                                                   |
| L410                 | CTTCACTTGAACGTTATCCGATTTACCACG                                                    |
| NP24                 | CACATCAGAAAATGGAATATCAGGTAGTAATTCC                                                |
| NP25                 | GGAATTACTACCTGATATTCCATTTTCTGATGTG                                                |
| NP32                 | CCCTGACGAAAGTCCAAGGGTTTAT                                                         |
| NP61                 | CCAGACCAGACATTACGAACTGG                                                           |
| NP62                 | AGACCAGACATTACGAACTGGCA                                                           |
| NP63                 | ACCAGACATTACGAACTGGCACA                                                           |
| NP64                 | CAGACATTACGAACTGGCACAGA                                                           |
| NP65                 | TGAATAAGAACGGTGCTCTCCAAAT                                                         |
| NP66                 | GCTGAATAAGAACGGTGCTCTCC                                                           |
| NP67                 | TAGCTGAATAAGAACGGTGCTCTCC                                                         |
| NP68                 | AATAGCTGAATAAGAACGGTGCTCT                                                         |
| NP99                 | ATCGCCTTCGTAGTAATAATTGTCATTTGCATACGTTACATCGATACAGTGTAGTTGGTCATAACCTGAAGGAAGATCTGG |
| NP100                | ACTACACTGTATCGATGTAACGTATGCAAATGACAATTATTACTACGAAGGCGATTCTGTGCCAGTTCGTAATGTCTGG   |
| NP102 <sup>(b)</sup> | ATTACGAACTGGCACAGAATCGCNNNNNTAGTAATAATTGTCATTTGCATACGT                            |
| NP103                | CGAAGGCGATTCTGTGCCAG                                                              |
| NP104 <sup>(b)</sup> | ACGAACTGGCACAGAATCGCCTTCGNNNNNATAATTGTCATTTGCATACGTTTACA                          |
| NP105 <sup>(b)</sup> | CTGGCACAGAATCGCCTTCGWWSWWWWWWWTGTCATTTGCATACGTTACATCG                             |
| NP106                | ATTATTACTACGAAGGCGATTCTG                                                          |

|                      |                                                          |
|----------------------|----------------------------------------------------------|
| NP107 <sup>(b)</sup> | GAATCGCCTTCGTAGTAATAATWSWSWWWSSATACGTTACATCGATACAGTGTAG  |
| NP108                | CGTATGCAAATGACAATTATTACTACG                              |
| NP109 <sup>(b)</sup> | TAATAATTGTCATTTGCATACGWWSWSSWWACAGTGTAGTTGGTCATAACCTGAAG |
| NP120                | GACATTACGAACTGGCACAGAAT                                  |
| NP121                | ATTACGAACTGGCACAGAATCG                                   |
| NP122                | TACGAACTGGCACAGAATCGC                                    |
| NP123                | GAACTGGCACAGAATCGCC                                      |
| NP124                | TGGCACAGAATCGCCTTCG                                      |
| NP125                | GCACAGAATCGCCTTCGTAG                                     |
| NP135 <sup>(a)</sup> | gaacACCACTAGTTGAAGTGTGTAAGGTGATTTAGTACg                  |
| NP136 <sup>(a)</sup> | cgatcGTAATAACACCTTACAACACTTCAACTAGTGGT                   |
| NP137 <sup>(a)</sup> | gaacCTCCTTGACTCGATCTAATATGTCTTTACACGTATg                 |
| NP138 <sup>(a)</sup> | cgatcATACGTGTAAAGACATATTAGATCGAGTCAAGGAG                 |
| NP183                | CGAGCGAGTGGCACATATCC                                     |
| NP184                | CCCTACATCTTGTGCAGGAGC                                    |
| NP189                | CTGGCACAGAATCGCAGAAGTAGTAATAATTGTCATTTGCATACGTTACATCG    |
| NP190                | TGACAATTATTACTAGTTCTCGGATTCTGTGCCAGTTCGTAATG             |
| NP191                | CTGGCACAGAATCGCAGAAGTAGTAATAATTGTCATTTGCATACGTTACATCG    |
| NP192                | TGACAATTATTACTATTCTCGCGATTCTGTGCCAGTTCGTAATG             |
| NP197                | CTGGCACAGAATCGCTCTACTAGTAATAATTGTCATTTGCATACGTTACATCG    |
| NP198                | TGACAATTATTACTAGTAGAGCGATTCTGTGCCAGTTCGTAATG             |
| NP199                | CTGGCACAGAATCGCGTCTATAGTAATAATTGTCATTTGCATACGTTACATCG    |
| NP200                | TGACAATTATTACTATAGACGCGATTCTGTGCCAGTTCGTAATG             |
| NP218                | CCTTCGATCATATAATTGTCATTTGCATACGTTACATCGAT                |
| NP219                | ACAATTATATGATCGAAGGCGATTCTGTGCCAG                        |
| NP220                | GCCTTCGATCATTATTATGTCATTTGCATACGTTACATCG                 |
| NP221                | CAAATGACATAATAATGATCGAAGGCGATTCTGTGCC                    |
| NP342                | ctttttattttaggaggcaaaaATGGGCCATCATCATCATCATC             |
| NP343                | ATGGCCCATttttgcctcctaaaataaaaagttaaattaaatcc             |
| PN71 <sup>(a)</sup>  | aaacATTACAACCTGCCAAGGAAATCCTATGCag                       |
| PN72 <sup>(a)</sup>  | aaaacTGCATAGGATTCCTTGGCAAGTTGTGAAT                       |
| PN87 <sup>(a)</sup>  | aaacTACTAAATCACCTTACAACACTTCAACTAGg                      |
| PN88 <sup>(a)</sup>  | aaaacCTAGTTGAAGTGTGTAAGGTGATTTAGTA                       |
| PN95                 | AAGAAATGGCGAAAGAAATCAATATTAG                             |
| PN96                 | TCTTCTGCAGGATTAGCCATC                                    |

**Supplementary Sequence. Related to STAR Methods. pNP61 CRISPR array.**

AATATAGTTGTGATGGCATTGTTAAAGTATCGGATCGATACCCACCCCGAAGAAA  
AGGGGACGTCTACACGTATGCCGAAGTATATAAATCATCAGTACAAAGGATCGATA  
CCCACCCCGAAGAAAAGGGGACGTCTACTAGTAATAATTGTCATTTGCATACGTTA  
CATCGATGATCGATACCCACCCCGAAGAAAAGGGGACGAGAACTAGTACGGTCGT  
GAACATTTTTTTCTTGATTCTCTGATCGATAGCCACCCCGAAGAAAAGGGGGCAGAG  
TGTAATCTAACAACACTCTAAAAAATTGTAG



**SUPPLEMENTARY DATA FILE S1. Related to STAR Methods. Analysis of next generation sequencing data.**
